# Supplementary material for: Serum Perilipin 2 (PLIN2) Predicts Multiple Organ Dysfunction in Critically Ill Patients
Source: MDPI journal article supplement (doi:10.3390/biomedicines9091210), 2021-09-13
Supplement: s1 [file s1]

# Serum Perilipin 2 (PLIN2) Predicts Multiple Organ Dysfunction in Critically Ill Patients

*Supplementary data:*

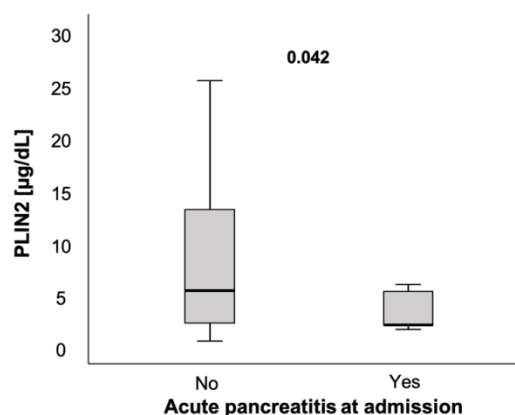

**Figure S1.** Patients admitted to the ICU due to acute pancreatitis showed decreased PLIN2 serum levels compared to patients admitted due to other reasons.

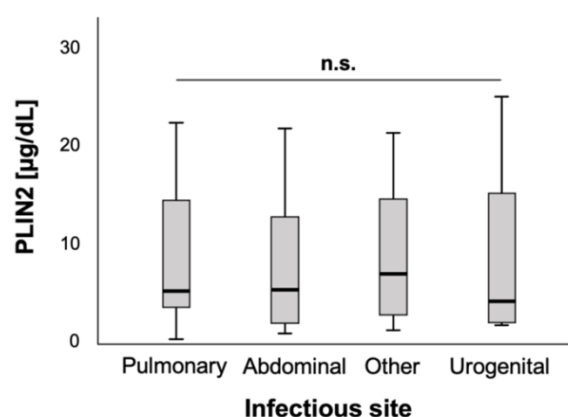

**Figure S2.** Serum PLIN2 levels at ICU admission in septic patients. PLIN2 serum concentrations were not different in patients with differing infectious sources.

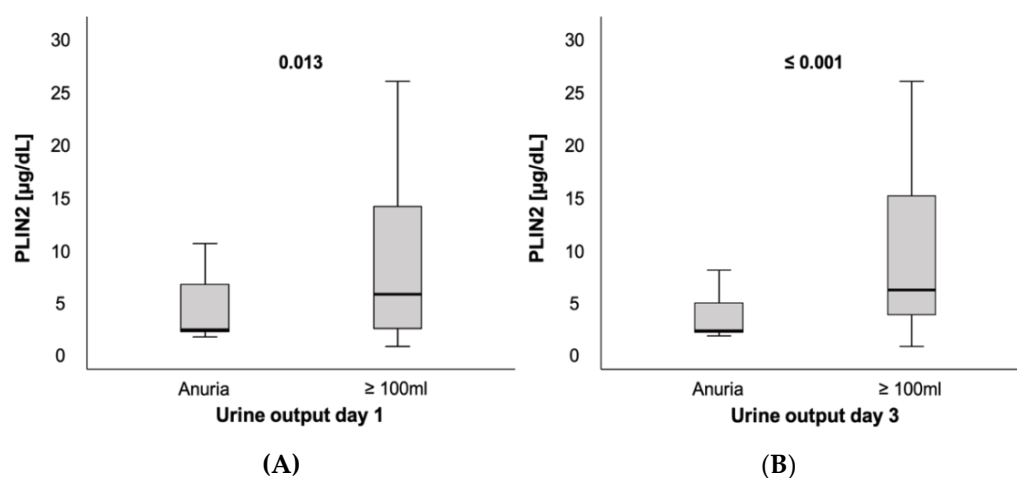

**Figures S3.** PLIN2 serum levels and urine output. **(A)** PLIN2 serum concentrations at day 1 were decreased in patients that were anuric at day of ICU admission. **(B)** Patients that were anuric at day 3 showed even lower PLIN2 levels at ICU admission.

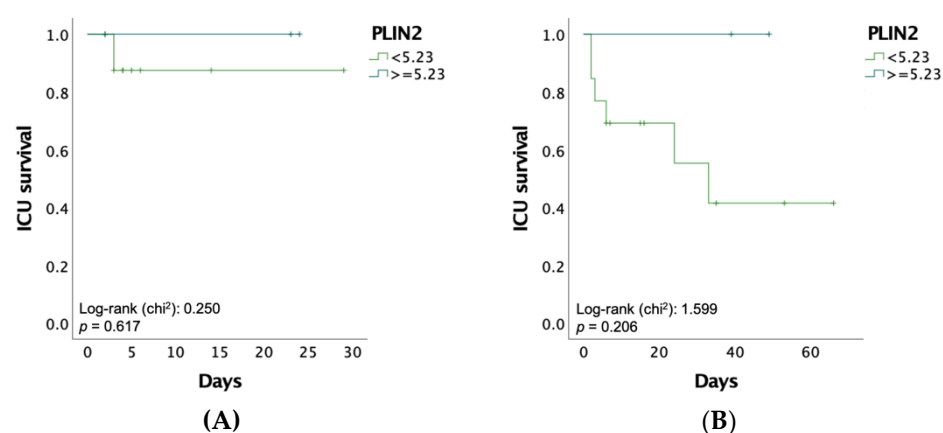

**Figure S4.** PLIN2 serum concentrations and ICU mortality. **(A)** Serum PLIN2 levels did not discriminate an ICU mortality difference in patients admitted due to acute pancreatitis. **(B)** Serum PLIN2 did not predict ICU mortality in patients with severe respiratory failure, defined as PaO<sub>2</sub>/FiO<sub>2</sub> <100.

| Biomarker    | r      | p      |
|--------------|--------|--------|
| Adiponectin  | -0.273 | 0.007* |
| RBP4         | 0.202  | 0.065  |
| APRIL        | 0.135  | 0.056  |
| sFRP5        | -0.175 | 0.007* |
| Calprotectin | 0.097  | 0.125  |
| Myostatin    | 0.160  | 0.010* |
| ADMA         | -0.197 | 0.002* |
| SDMA         | -0.154 | 0.017* |
| suPAR        | -0.049 | 0.499  |

**Table S1.** Correlations of experimental biomarkers with PLIN2 serum concentrations at ICU admission. Spearman rank correlation test was used. Abbreviations: RBP4: Retinol binding protein 4; APRIL: A proliferation-inducing ligand; sFRP5: Secreted frizzled-related protein 5; ADMA: Asymmetric dimethylarginine; SDMA: Symmetric dimethylarginine; suPAR: Soluble urokinase-type plasminogen activator receptor.

| Critical illness other than sepsis n (%)        | 93 (35.9%)         |
|-------------------------------------------------|--------------------|
| <b>Etiology n (relative /absolute):</b>         |                    |
| Cardiopulmonary disease                         | 32 (34.4% / 12.4%) |
| Decompensated liver cirrhosis                   | 16 (17.2% / 6.2%)  |
| Acute pancreatitis                              | 13 (14% / 5%)      |
| Severe gastrointestinal bleeding                | 6 (6.5% / 2.3%)    |
| Acute liver failure                             | 4 (4.3% / 1.5%)    |
| Other                                           | 22 (23.7% / 8.5%)  |
| <b>Sepsis n (%)</b>                             | <b>166 (64.1%)</b> |
| <b>Infectious site n (relative / absolute):</b> |                    |
| Pulmonary                                       | 92 (55.4% / 35.5%) |
| Abdominal                                       | 32 (19.3% / 12.4%) |
| Urogenital                                      | 7 (4.2% / 2.7%)    |
| Other                                           | 35 (21.1% / 13.5%) |

**Table S2.** Main cause for admission to the intensive care unit.
